# Supplementary material for: Microstrain effects of laser-ablated Au nanoparticles in enhancing CZTS-based 1 Sun photodetector devices
Source: Royal Society of Chemistry journal article supplement (doi:10.1039/d4cp00238e), 2024-01-01
Supplement: d4cp00238e1.pdf [file d4cp00238e1.pdf]

## Supplementary Information

### **Microstrain Effects of Laser-Ablated Au Nanoparticles in Enhancing CZTS-based 1 Sun Photodetector Device**

Serap Yiğit Gezgin<sup>1</sup>, Walid Belaid<sup>1</sup>, Mohamed A. Basyooni-M. Kabatas<sup>2,3,4\*</sup>, Yasin Ramazan Eker<sup>4,5</sup>, and Hamdi Şükür Kiliç<sup>1,6,7</sup>

<sup>1</sup> Department of Physics, Faculty of Science, Selçuk University, Konya, 42075, Turkey

<sup>2</sup> Dynamics of Micro and Nano Systems Group, Department of Precision and Microsystems Engineering, Delft University of Technology, Mekelweg 2, 2628 CD Delft, The Netherlands

<sup>3</sup> Solar Research Laboratory, Solar and Space Research Department, National Research Institute of Astronomy and Geophysics, 11421 Cairo, Egypt

<sup>4</sup> Science and Technology Research and Application Center (BITAM), Necmettin Erbakan University, 42090 Konya, Turkey

<sup>5</sup> Department of Basic Sciences, Faculty of Engineering, Necmettin Erbakan University, 42090 Konya, Turkey

<sup>6</sup> Directorate of High Technology Research and Application Center, University of Selçuk, 42031 Konya, Turkey

<sup>7</sup> Directorate of Laser-Induced Proton Therapy Application and Research Center, University of Selçuk, 42031 Konya, Turkey

\* Corresponding author: Mohamed A. Basyooni-M. Kabatas ([m.kabatas@tudelft.nl](mailto:m.kabatas@tudelft.nl) & [m.a.basyooni@gmail.com](mailto:m.a.basyooni@gmail.com))

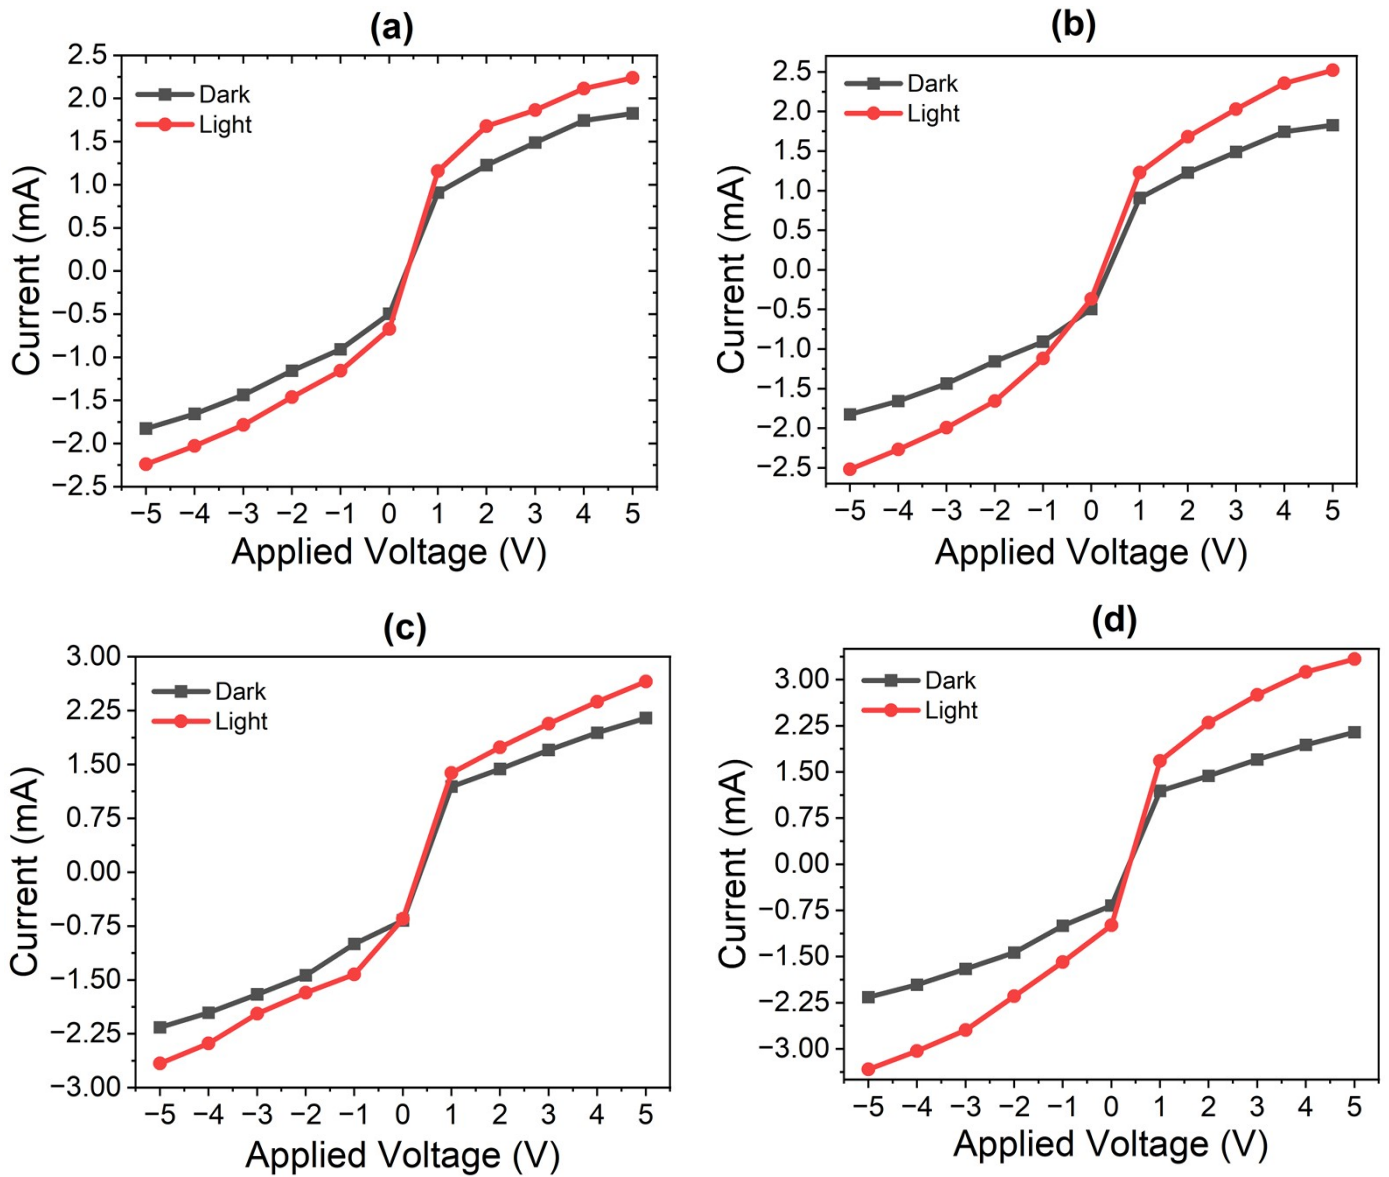

**Fig. A1.** I–V behavior (a) CZTS(1) (b) CZTS(2) (c) AuNPs@CZTS(1) and (d) AuNPs@CZTS(2) thin films.

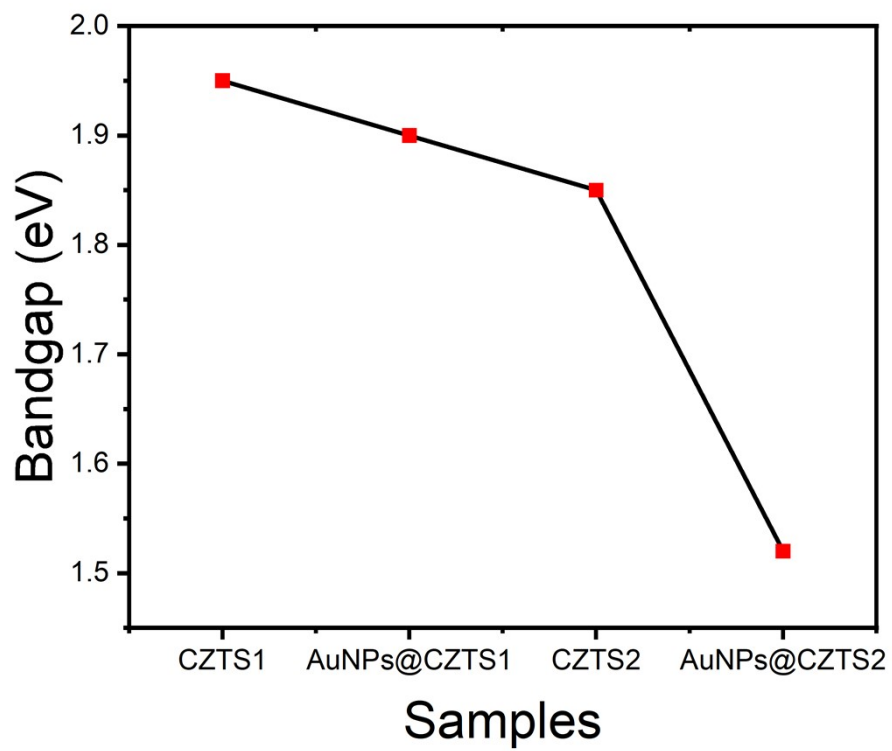

**Fig. A2.** Bandgap energies for CZTS1, AuNPs@CZTS1, CZTS2, and AuNPs@CZTS2 samples.
